# Supplementary material for: Drosophila americana as a Model Species for Comparative Studies on the Molecular Basis of Phenotypic Variation
Source: PubMed Central journal article supplement — Genome Biol Evol. 2013 Mar 14;5(4):661–79. doi: 10.1093/gbe/evt037 (PMC3641629; doi:10.1093/gbe/evt037), 2013-03-14
Supplement: supp_evt037_Sup_Table_S5.pdf [file supp_evt037_Sup_Table_S5.pdf]

**Supplementary Table S5.** Lifespan differences among F2 association crosses

| Cross                | W11♂ x W46♀                | W29♂ x O57♀               | O57♂ x H5♀                  | W46♂ x W29♀                 |
|----------------------|----------------------------|---------------------------|-----------------------------|-----------------------------|
|                      | (64,81*)                   | (54,59*)                  | (49,67*)                    | (46,47*)                    |
| H5♂ x W11♀ (54,91*)  | <b><i>P</i> &lt; 0.01#</b> | <i>P</i> > 0.05           | <i>P</i> > 0.05             | <b><i>P</i> &lt; 0.05</b>   |
| W11♂ x W46♀ (64,81*) | -                          | <b><i>P</i> &lt; 0.05</b> | <b><i>P</i> &lt; 0.001#</b> | <b><i>P</i> &lt; 0.001#</b> |
| W29♂ x O57♀ (54,59*) | -                          | -                         | <b><i>P</i> &lt; 0.05</b>   | <b><i>P</i> &lt; 0.005#</b> |
| O57♂ x H5♀ (49,67*)  | -                          | -                         | -                           | <i>P</i> > 0.05             |

\* average lifespan in days

# significant after applying the sequential Bonferroni correction
